# Supplementary material for: Copy Number Variants in Extended Autism Spectrum Disorder Families Reveal Candidates Potentially Involved in Autism Risk
Source: PLoS One. 2011 Oct 7;6(10):e26049. doi: 10.1371/journal.pone.0026049 (PMC3189231; doi:10.1371/journal.pone.0026049)
Supplement: Table S2 — Number Variations identified in Autism Spectrum Disorder Family Cohort and Control Individuals. Summary of the number of variations identified, with case and control samples divided by DNA source (blood, cell lines, or saliva) and the type of Illumina SNP array chip used (either version 1Mv1_C or 1M-DuoV3). (XLSX) [file pone.0026049.s003.xlsx]

## Sheet: Sheet1
Supporting Table S2: Copy Number Variations identified in Autism Spectrum Disorder Family Cohort and Control Individuals
Sample (Illumina’s Human BeadChip Version, DNA Source)	Number of samples	Number of CNVs per individual, min-max	1st Quantile	Median	Mean	3rd Quantile	Standard Deviation
Family cohort (1Mv1_C, blood)	239	27-190	50.5	60†‡	62.49	71	18.43
Family cohort (1Mv1_C, cell lines)	94	29-272	57.2	71†	81	89	42.9
Family cohort (1M-DuoV3, blood)	27	37-233	56	74‡	80.3	95	39.5
Family cohort (1M-DuoV3, saliva)	7	54-123	69	76	79	81	21.8
Family cohort (1M-DuoV3, cell lines )	15	39-116	56	64	66.9	71.5	20.1
Family cohort combined	382	27-272	52	63	68.8	76	29.4
HIHG controls (1M-DuoV3, saliva)	512	32-296	62.7	75*	86.9	98	39.1
NBC controls (1M-DuoV3, cord blood)	326	20-269	52	60*	64.4	70.7	25.4
Combined controls	838	20-296	57	68	78.2	86	36.2
HIHG - University of Miami Hussman Institute for Human Genomics control cohort
NBC - Nashville Birth Cohort
* p < 2.2e-16, † p = 2.54e-5, ‡ p = 0.009 by the Kruskal-Wallis sum rank test
