# Supplementary material for: Copy Number Variants in Extended Autism Spectrum Disorder Families Reveal Candidates Potentially Involved in Autism Risk
Source: PLoS One. 2011 Oct 7;6(10):e26049. doi: 10.1371/journal.pone.0026049 (PMC3189231; doi:10.1371/journal.pone.0026049)
Supplement: Table S3 — Clinical Information for Families with Validated Copy Number Variations. This table provides phenotype information for all family members evaluated, with emphasis on ASD symptoms and developmental and neuropsychiatric diagnoses. Deletions and then duplications are listed, organized by chromosomal location. (XLSX) [file pone.0026049.s004.xlsx]

## Sheet: Sheet1
Supporting Table S3: Clinical Information for Families with Validated Copy Number Variations
Family, CNV Region	Individual	Gender	CNV	ASD Diagnosis	Developmental History	Additional Neuropsychiatric Features or History	Dysmorphic Features
17545 1p34.1	001	M	del	Autism		Possible Angelman’s Syndrome, Tourette’s
	100	M	del	Autism			Macrocephaly
	102	F	del
	103	F	del	ASD symptoms	Developmental delay	Depression	Macrocephaly
	1000*	M	none			Possible alcoholism
	1001*	F	del			Possible ADHD, possible alcoholism
	1002*	F	del			Depression	Microcephaly
	1004*	M	none				Macrocephaly
	2002	M	none
7745 2p24.2-p24.1	001	M	del	PDD-NOS	Language delay, regression of social interest	ADHD symptoms. Previous diagnoses of OCD, Schizophrenia, and Tourette’s	Borderline macrocephaly
	104	M	del	PDD-NOS	Language delay
	1001	F	del			OCD, anxiety disorder
	1006*	M	none		Language delay	ADHD
	1007*	F	del
	2002	M	none			Alcoholism
	2006*	M	del		Language delay
	2007*	F	none
17342	001	M	del	Autism
6q11.1	100	M	del	Asperger's Syndrome		ADHD symptoms
	101	M	none			ODD, anger issues, possible bipolar disorder
	1000*	M	none
	1001*	F	del			Depression, possible ADHD
	1008*	F	del			Depression, possible ADHD
	1017*	M	none
	2002*	M	none
	2003*	F	del
17678	001	M	del	Autism
12q24.32	100	M	none
	107	M	del	Asperger's Syndrome		ADHD symptoms
	108	F	del				Hyperextensibility
	109	F	del				Hyperextensibility
	1000*	M	none			Anxiety/Panic disorder
	1001*	F	del
	1009*	M	del	ASD symptoms
	1010*	F	none			Depression
	2003	F	none			Depression
17142 13q31.1	001	M	del	PDD-NOS	Overall low muscle tone, delayed language development
	100	M	del		Gifted		Goldenhar Syndrome
	106	M	del	PDD-NOS	Regression of social engagement at 96 months	ADHD symptoms, depression, possible schizophrenia, seizures
	1000*	M	del
	1001*	F	none			Postpartum depression after birth of 101
	1009	F	del			Depression, postpartum depression after birth of 106
	2000*	M	none
	2001*	F	del			Depression
	3001	M	none
37994 3p26.3	001	M	dup	Autism	Delayed milestones: sitting, phrases, nonverbal	Seizures
	100	F	dup
	103	M	dup	Autism	Limited functional language, regression of social engagement at 28 months		Large birthmark on back
	104	M	dup
	1000*	M	none
	1001*	F	dup			Bipolar disorder
	1006	F	dup
	2003	F	dup
7663 4p16.3	001	M	dup	Autism	Nonverbal, mental retardation	Possible seizures
	100	F	dup	Autism	Nonverbal	Petit mal seizures	Macrocephaly; hyperextensibility
	132	M	dup	Autism	Language delay	OCD, social anxiety, narcolepsy, ADHD symptoms
	134	M	dup	Autism	Regression of purposive hand use and motor skills at 48 months for a duration of 120 months	ADHD symptoms
	1000*	M	none
	1001*	F	dup		Speech therapy as a child
	1017	F	dup		Speech therapy as a child
	2002	M	dup
17122 7p21.3 & 15q24.1	001	M	dups	Autism	Language delays, fine motor delay, low muscle tone/muscle weakness, moderate intellectual disability	abnormal EEGs, ADHD symptoms, learning disabilities	macrocephaly
	100	M	dups	Autism	Language delays, regression at 11 months	ADHD symptoms, Sensory deficits
	101	M	dups	Autism	Mild oral motor and articulation delays, awkward gait	Reading disorder, ADHD symptoms, mood disorder NOS, learning disabilities	Dental misalignment
	102	M	none
	1000*	M	none		Stuttering
	1001*	F	dups
	1004	M	7p21 only	ASD symptoms	Nonverbal, mental retardation	Repetitive behaviors, Parkinson disease, dementia
	1006*	F	dups			History of tics, several fears
	1007*	M	none
37232 10p12.31	001	M	dup	Autism	Phonological disorder, language delay	Possible seizures
	108	M	dup	Asperger's Syndrome	Delayed gross motor skills		Light spot on forehead
	109	F	none
	110	F	dup
	1000*	M	none
	1001*	F	dup			Depression
	1006*	M	dup
	1007*	F	none
	2002*	M	dup			Alcoholism
	2003*	F	none
37425 10q23.32	001	M	dup	Autism	Language delay, regression of motor skills at 42 months for a duration of 62 months	ADHD symptoms	Macrocephaly
	100	M	dup	Asperger's Syndrome		ADHD symptoms
	101	M	dup			ADHD, ODD
	107	M	dup
	1001	F	dup
	1006	F	dup			Anxiety/Panic disorder
	2003	F	none			Anxiety/Panic disorder
17668	001	M	dup	Autism	Language delay		Macrocephaly
15q11.2	103	M	dup	Autism	Language delay, mental retardation		Macrocephaly
	1000*	M	dup
	1001*	F	none			Anxiety, bulimia
	1003*	M	none				Macrocephaly
	1004*	F	dup			Depression, bulimia
	2000	M	none
	2001	F	none
*samples used to compare CNV carriers to their spouses
del - deletion, dup - duplication
